# Supplementary material for: Plant Beneficial Deep-Sea Actinobacterium, Dermacoccus abyssi MT1.1T Promote Growth of Tomato (Solanum lycopersicum) under Salinity Stress
Source: MDPI journal article supplement (doi:10.3390/biology11020191), 2022-01-26
Supplement: s1 [file s1]

Supplementary figures for “Plant Beneficial Deep-Sea Actinobacterium, *Derma*coccus *abyssi* MT1.1<sup>T</sup> Promote Growth of Tomato (*Solanum lycopersicum*) under Salinity Stress”

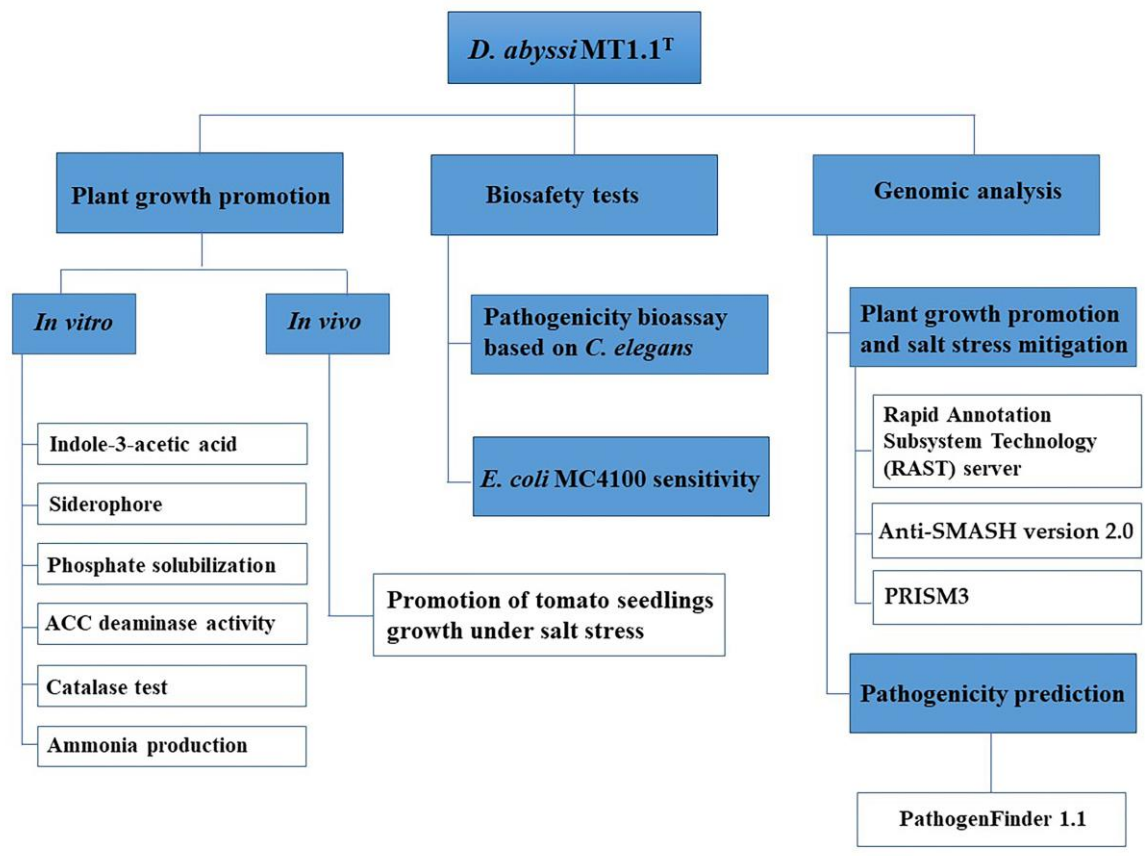

Figure S1. Overviews of all experimental methods used in this study.

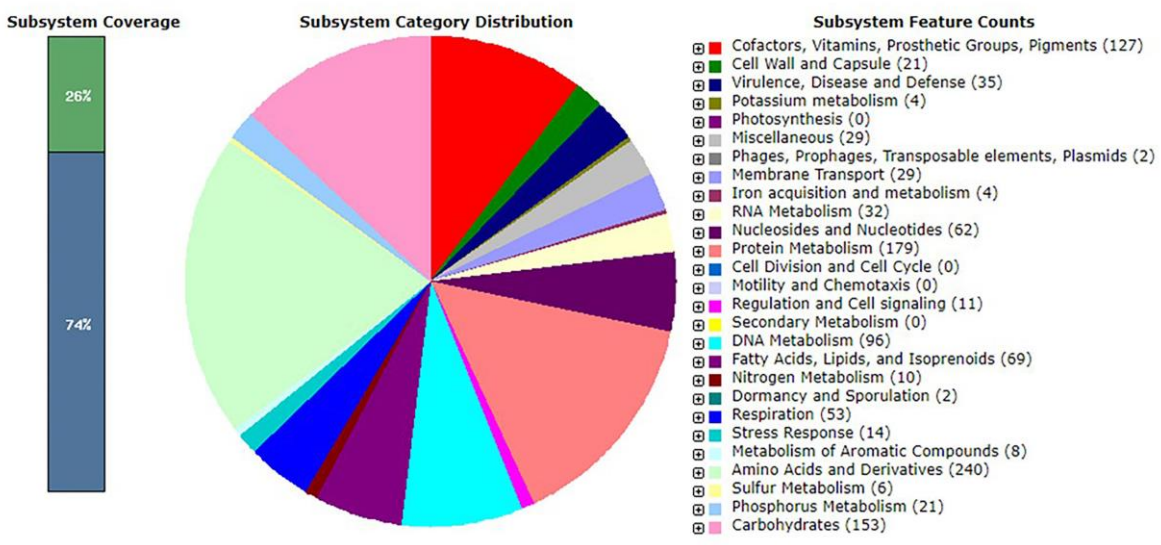

Figure S2. Subsystems of predicted genes in *D. abyssi* MT1.1<sup>T</sup> genome using RAST server.
